# Supplementary material
Source: PubMed Central journal article supplement (PMC8028675)
Supplement: BPA-29-741-s001.pdf [file BPA-29-741-s001.pdf]

Table S1

| Primary Antibody                            | Host       | Company   | Catalog No. | Lot No.    | Dilution |
|---------------------------------------------|------------|-----------|-------------|------------|----------|
| Anti- $\alpha$ -synuclein 81a (pSer129)     | Mouse      | BioLegend | 825701      | B213120    | 1:1000   |
| Anti- $\alpha$ -synuclein EP1536Y (pSer129) | Rabbit     | Abcam     | ab 51253    | GR285618-8 | 1:1000   |
| Anti-NeuN                                   | Guinea pig | Millipore | ABN90       | 2872224    | 1:6000   |
| Anti-Tyrosine Hydroxylase                   | Mouse      | Millipore | MAB318      | 2742733    | 1:2000   |
| Anti-Dopamine Transporter                   | Rat        | Millipore | MAB369      | 2701007    | 1:4000   |

| Secondary Antibody           | Host   | Company                | Catalog No. | Lot No. | Dilution |
|------------------------------|--------|------------------------|-------------|---------|----------|
| Goat anti-mouse @555         | Goat   | Life Technologies      | A21424      | 1141876 | 1:1000   |
| Donkey anti-guinea pig @ 647 | Donkey | Jackson ImmunoResearch | 706-605-148 | 123960  | 1:1000   |
| Goat anti-rabbit @ 555       | Goat   | Life Technologies      | A21429      | 1562309 | 1:1000   |
| Donkey anti-rat @ 790        | Donkey | Jackson ImmunoResearch | 712-655-150 | 106408  | 1:1000   |
| Donkey anti-mouse @ 680      | Donkey | Jackson ImmunoResearch | 712-625-151 | 127891  | 1:1000   |
| Donkey anti-mouse @ 647      | Donkey | Jackson ImmunoResearch | 712-605-150 | 127706  | 1:1000   |
| Goat anti-mouse @ 488        | Goat   | Life Technologies      | A11029      | 1550911 | 1:1000   |
