# Supplementary material
Source: PubMed Central journal article supplement (PMC8028675)
Supplement: BPA-29-741-s002.pdf [file BPA-29-741-s002.pdf]

Table S2: Abbreviations

|       |                                      |      |                                        |
|-------|--------------------------------------|------|----------------------------------------|
| 5N    | motor trigeminal nucleus             | ic   | internal capsule                       |
| 7n    | facial nerve                         | IC   | inferior colliculus                    |
| 7N    | facial nucleus                       | lfp  | longitudinal fasciculus of pons        |
| 8n    | vestibulocochlear nerve              | LH   | lateral habenula                       |
| A30   | cingulate cortex, area 30            | LM   | lateral mammillary nucleus             |
| AA    | anterior amygdaloid area             | lo   | lateral olfactory tract                |
| ac    | anterior commissure                  | LO   | lateral orbital cortex                 |
| aca   | anterior commissure, anterior part   | LOT  | nucleus of the lateral olfactory tract |
| Acb   | nucleus accumbens                    | LPMR | lateral post thalamic nu, mediorostro  |
| AcbC  | nucleus accumbens core               | Lrt  | lateral reticular nucleus              |
| AcbSh | nucleus accumbens shell              | LS   | lateral septal nucleus                 |
| aci   | anterior commissure, intrabulbar     | LSd  | lateral septal nucleus, dorsal part    |
| acp   | anterior commissure, posterior part  | LSv  | lateral septal nucleus, ventral part   |
| AHi   | amygdalohippocampal area             | LTDg | laterodorsal tegmental nucleus         |
| AID   | dorsal agranular insular cortex      | LV   | lateral ventricle                      |
| AIV   | ventral agranular insular cortex     | M1   | primary motor cortex                   |
| AMG   | amygdala                             | M2   | secondary motor cortex                 |
| AOB   | accessory olfactory bulb             | MD   | mediodorsal thalamic nucleus           |
| AOD   | anterior olfactory area, dorsal      | MDL  | mediodorsal thalamic nucleus, lateral  |
| AOE   | anterior olfactory nucleus, external | MEA  | medial amygdala                        |
| AOL   | anterior olfactory nucleus, lateral  | MEnt | medial entorhinal cortex               |
| AOM   | anterior olfactory nucleus, medial   | ml   | medial lemniscus                       |
| AON   | anterior olfactory nucleus           | mlf  | medial longitudinal fasciculus         |
| AOP   | anterior olfactory area, posterior   | MoDG | molecular layer of dentate gyrus       |
| AOV   | anterior olfactory area, ventral     | MVe  | medial vestibular nucleus              |
| APir  | amygdalopiriform transition area     | OB   | olfactory bulb                         |
| AV    | anteroventral thalamic nucleus       | och  | optic chiasm                           |
| BLA   | basolateral nucleus of amygdala      | ot   | optic tract                            |
| BMA   | basomedial nucleus of amygdala       | PBP  | parabrachial pigmented nucleus         |
| BST   | bed nucleus of the stria terminalis  | Pir  | piriform cortex                        |
| CA1   | cornu ammonis, field 1               | PMCo | posteromedial cortical amygdala        |
| CA2   | cornu ammonis, field 2               | Pn   | pontine nuclei                         |
| CA3   | cornu ammonis, field 3               | PnO  | pontine reticular nucleus, oral part   |
| cc    | corpus callosum                      | Pr5  | principal trigeminal nucleus           |
| CEA   | central nucleus of amygdala          | rf   | rhinal fissure                         |
| CEnt  | caudomedial entorhinal cortex        | rms  | rostral migratory stream               |
| cp    | cerebral peduncle                    | Sub  | subiculum                              |
| CPu   | caudoputamen                         | S1   | primary somatosensory cortex           |
| cst   | commissural stria terminalis         | SC   | superior colliculus                    |
| DG    | dentate gyrus                        | scp  | superior cerebellar peduncle           |
| DS    | dorsal subiculum                     | sm   | stria medullaris                       |
| DTT   | dorsal tenia tecta                   | SNpc | substantia nigra, pars compacta        |
| Ect   | ectorhinal cortex                    | SNpr | substantia nigra, pars reticulata      |
| Ent   | entorhinal cortex                    | sp   | spinal trigeminal tract                |

|      |                                          |     |                                   |
|------|------------------------------------------|-----|-----------------------------------|
| EPI  | external plexiform layer, olfactory bulb | Sp  | spinal trigeminal nucleus         |
| FC   | frontal cortex                           | Sub | subiculum                         |
| fi   | fimbria                                  | SVZ | subventricular zone               |
| fmi  | forceps minor of the corpus callosum     | TeA | temporal association cortex       |
| fmj  | forceps major of corpus callosum         | TT  | tenia tecta                       |
| fr   | fasciculus retroflexus                   | Tub | olfactory tubercle                |
| Gl   | glomerular layer, OB                     | tz  | trapezoid body                    |
| GP   | globus pallidus                          | VDB | ventral diagonal band             |
| GrA  | granule cell layer of accessory OB       | VM  | ventromedial thalamic nucleus     |
| GrDG | granule cell layer of dentate gyrus      | VMH | ventromedial hypothalamic nucleus |
| GrO  | granule cell layer of OB                 | VO  | ventral orbital cortex            |
| HDB  | horizontal limb of the diagonal band     | VTT | ventral tenia tecta               |
| hf   | hippocampal fissure                      |     |                                   |
